# Supplementary material for: Comparison of the elastic recovery and strain-in-compression of commercial and novel vinyl polysiloxane impression materials incorporating a novel crosslinking agent and a surfactant
Source: PeerJ. 2023 Jul 24;11:e15677. doi: 10.7717/peerj.15677 (PMC10373643; doi:10.7717/peerj.15677)
Supplement: Supplemental Information 2 [file peerj-11-15677-s002.xlsx]

## Sheet: Aq M
Aquasil Monophase: Elastic Recovery
Sample Nos.	h1 (mm)	h2 (mm)	ho (mm)	% Elastic Recovery (K)
S1	22.671	22.634	20	99.815
S2	22.257	22.069	20	99.06
S3	22.492	22.401	20	99.545
S4	22.589	22.457	20	99.34
S5	22.935	22.673	20	98.69
S6	22.909	22.785	20	99.38
S7	23.005	22.8454	20	99.202
S8	22.984	22.889	20	99.525
S9	23.094	22.966	20	99.36
S10	22.846	22.701	20	99.275
S11	23.506	23.113	20	98.035
S12	23.45	23.194	20	98.72
Average				99.3192
SD				0.30253

## Sheet: Elt M
Elite HD Monophase: Elastic Recovery
Sample Nos.	h1 (mm)	h2 (mm)	ho (mm)	% Elastic Recovery (K)
S1	22.871	22.724	20	99.265
S2	22.764	22.663	20	99.495
S3	23.174	23.092	20	99.59
S4	23.106	22.791	20	98.425
S5	23.04	22.907	20	99.335
S6	23.332	23.224	20	99.46
S7	23.487	23.364	20	99.385
S8	23.376	23.214	20	99.19
S9	23.359	23.207	20	99.24
S10	23.249	23.197	20	99.74
S11	23.639	23.416	20	98.885
S12	23.651	23.458	20	99.035
Average				99.3125
SD				0.354458

## Sheet: Extr M
Extrude Medium: Elastic Recovery
Sample Nos.	h1 (mm)	h2 (mm)	ho (mm)	% Elastic Recovery (K)
S1	23.097	22.895	20	98.99
S2	22.748	22.664	20	99.58
S3	22.842	22.738	20	99.48
S4	23.053	22.816	20	98.815
S5	22.99	22.763	20	98.865
S6	23.168	23.009	20	99.205
S7	23.196	23.089	20	99.465
S8	22.755	22.699	20	99.72
S9	23.187	23.008	20	99.105
S10	23.064	22.955	20	99.455
S11	23.416	23.298	20	99.41
S12	23.41	23.196	20	98.93
Average				99.268
SD				0.315491

## Sheet: Exp-I
Exp-I (Comp 131): Elastic Recovery
Sample Nos.	h1 (mm)	h2 (mm)	ho (mm)	% Elastic Recovery (K)
S1	23.466	23.369	20	99.515
S2	23.371	23.259	20	99.44
S3	23.36	23.115	20	98.775
S4	23.315	23.206	20	99.455
S5	23.291	23.245	20	99.77
S6	23.485	23.436	20	99.755
S7	23.516	23.487	20	99.855
S8	23.489	23.317	20	99.14
S9	23.479	23.112	20	98.165
S10	23.516	23.378	20	99.31
S11	23.416	23.378	20	99.81
S12	23.378	23.168	20	98.95
Average				99.318
SD				0.517699

## Sheet: Exp-II
Exp-II (Comp 132): Elastic Recovery
Sample Nos.	h1 (mm)	h2 (mm)	ho (mm)	% Elastic Recovery (K)
S1	23.26	23.193	20	99.665
S2	23.251	23.186	20	99.675
S3	23.275	23.189	20	99.57
S4	23.245	23.145	20	99.5
S5	23.157	23.098	20	99.705
S6	23.491	23.443	20	99.76
S7	23.458	23.41	20	99.76
S8	23.481	23.471	20	99.95
S9	23.478	23.401	20	99.615
S10	23.451	23.31	20	99.295
S11	23.441	23.401	20	99.8
S12	23.452	23.405	20	99.765
Average				99.6495
SD				0.0853376

## Sheet: Exp-III
Exp-III (Comp 152-a): Elastic Recovery
Sample Nos.	h1 (mm)	h2 (mm)	ho (mm)	% Elastic Recovery (K)
S1	23.671	23.533	20	99.31
S2	23.548	23.505	20	99.785
S3	23.587	23.542	20	99.775
S4	23.71	23.588	20	99.39
S5	23.566	23.51	20	99.72
S6	23.62	23.571	20	99.755
S7	23.552	23.51	20	99.79
S8	23.558	23.341	20	98.915
S9	23.629	23.599	20	99.85
S10	23.569	23.31	20	98.705
S11	23.529	23.21	20	98.405
S12	23.449	23.11	20	98.305
Average				99.4995
SD				0.227689

## Sheet: Exp-IV
Exp-IV (Comp 152-b): Elastic Recovery
Sample Nos.	h1 (mm)	h2 (mm)	ho (mm)	% Elastic Recovery (K)
S1	23.166	23.019	20	99.265
S2	23.011	23.001	20	99.95
S3	23.092	23.001	20	99.545
S4	23.18	23.08	20	99.5
S5	23.191	23.07	20	99.395
S6	23.647	23.463	20	99.08
S7	23.475	23.382	20	99.535
S8	23.491	23.258	20	98.835
S9	23.582	23.417	20	99.175
S10	23.517	23.401	20	99.42
S11	23.217	23.101	20	99.42
S12	23.441	23.301	20	99.3
Average				99.37
SD				0.257861

## Sheet: Exp-V
Exp-V (Comp 152-c): Elastic Recovery
Sample Nos.	h1 (mm)	h2 (mm)	ho (mm)	% Elastic Recovery (K)
S1	23.283	23.177	20	99.47
S2	23.201	23.107	20	99.53
S3	23.204	23.055	20	99.255
S4	23.058	22.998	20	99.7
S5	22.989	22.884	20	99.475
S6	23.262	23.022	20	98.8
S7	23.023	22.87	20	99.235
S8	23.001	22.724	20	98.615
S9	23.005	22.719	20	98.57
S10	23.01	22.715	20	98.525
S11	23.011	22.715	20	98.52
S12	23.223	22.915	20	98.46
Average				99.1175
SD				0.159272

## Sheet: Comml and Exp VPS
Elastic Recovery (%): Comml and Exp VPS
Materials	Elastic recovery	SD
Aq M	99.3192	0.30253
Elt M	99.3125	0.354458
Extr M	99.268	0.315491
Exp-I	99.318	0.517699
Exp-II	99.6495	0.0853376
Exp-III	99.4995	0.227689
Exp-IV	99.37	0.257861
Exp-V	99.1175	0.159272

## Sheet: Combine Graph
Elastic Recovery and Strsain-in-compression (Comml and Exp VPS)
Elastic Recovery			% Strain-in-compression
Materials	Elastic recovery	SD	Materials	% Strain-in-compression	SD
Aq M	99.3192	0.30253	Aq M	4.26083	0.153546	0
Elt M	99.3125	0.354458	Elt M	3.15292	0.176641	0
Extr M	99.268	0.315491	Extr M	4.40542	0.117907	0
Exp-I	99.318	0.517699	Exp-I	4.67708	0.206502	0
Exp-II	99.6495	0.0853376	Exp-II	5.36042	0.163255	0
Exp-III	99.4995	0.227689	Exp-III	6.13667	0.255524	0
Exp-IV	99.37	0.257861	Exp-IV	6.54125	0.239147	0
Exp-V	99.1175	0.159272	Exp-V	7.07625	0.21966	0

[truncated: 1 more sheets: Combine Table]
